# Supplementary material
Source: PubMed Central journal article supplement (PMC7781159)
Supplement: NIHMS1635780-supplement-25022019100600_Appendix.pdf [file NIHMS1635780-supplement-25022019100600_Appendix.pdf]

# Appendix A

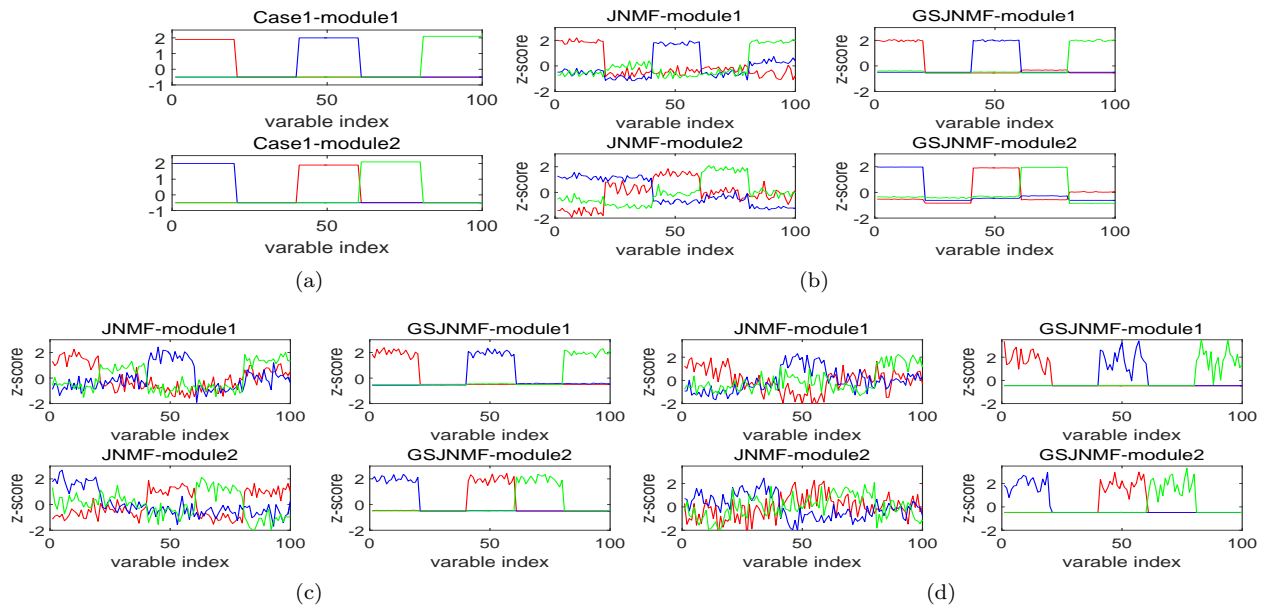

Figure A.1. The z-score of the variables from JNMF and GSJNMF model in Case 1. (a) The variable indices of the correlated module in Case 1. (b) The noise level  $\sigma = 0.5$ . (c) The noise level  $\sigma = 1$ . (d) The noise level  $\sigma = 1.5$ .

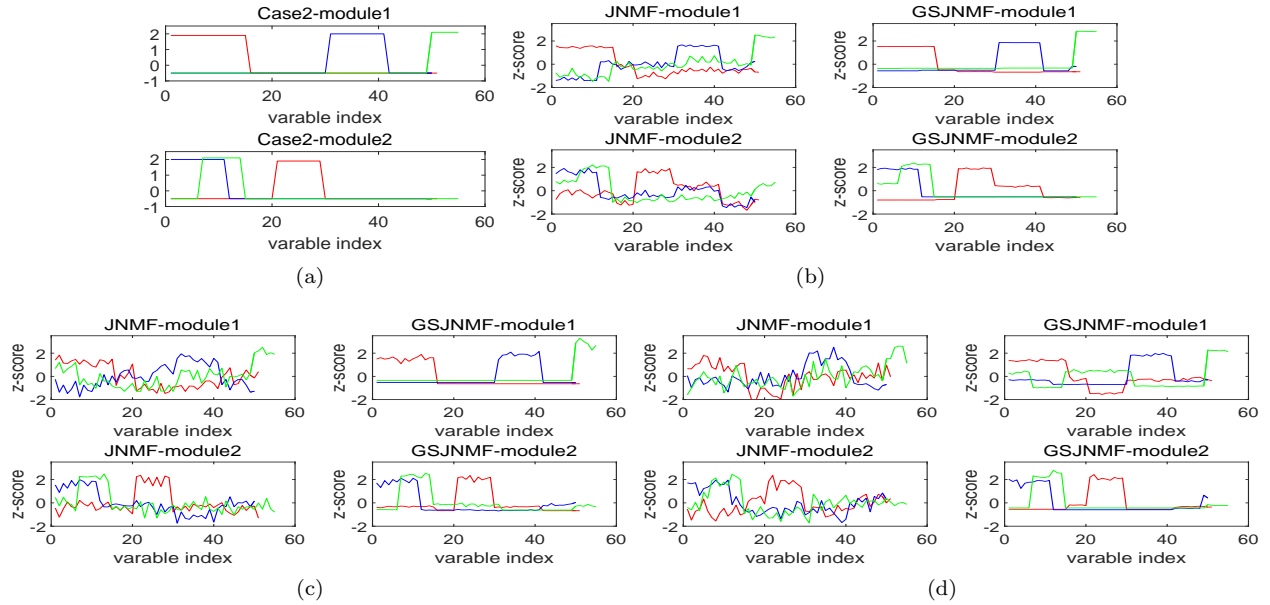

Figure A.2. The z-score of the variables from JNMF and GSJNMF model in Case 2. (a) The variable indices of the correlated module in Case 2. (b) The noise level  $\sigma = 0.5$ . (c) The noise level  $\sigma = 1$ . (d) The noise level  $\sigma = 1.5$ .

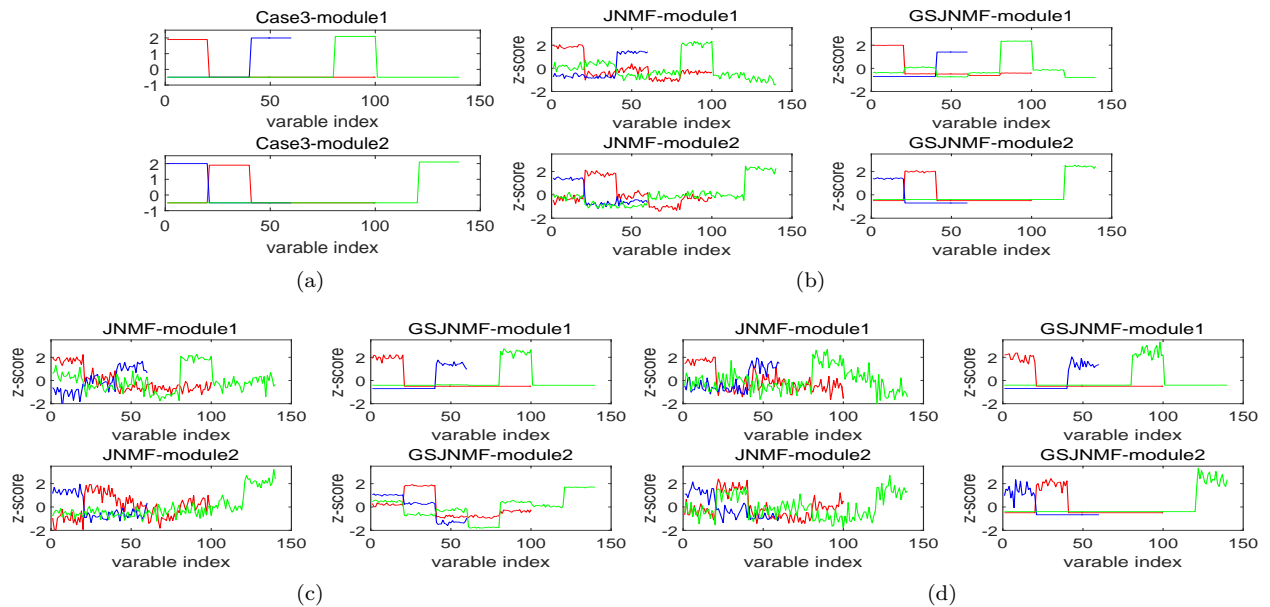

Figure A.3. The z-score of the variables from JNMF and GSJNMF model in Case 3. (a) The variable indices of the correlated module in Case 3. (b) The noise level  $\sigma = 0.5$ . (c) The noise level  $\sigma = 1$ . (d) The noise level  $\sigma = 1.5$ .

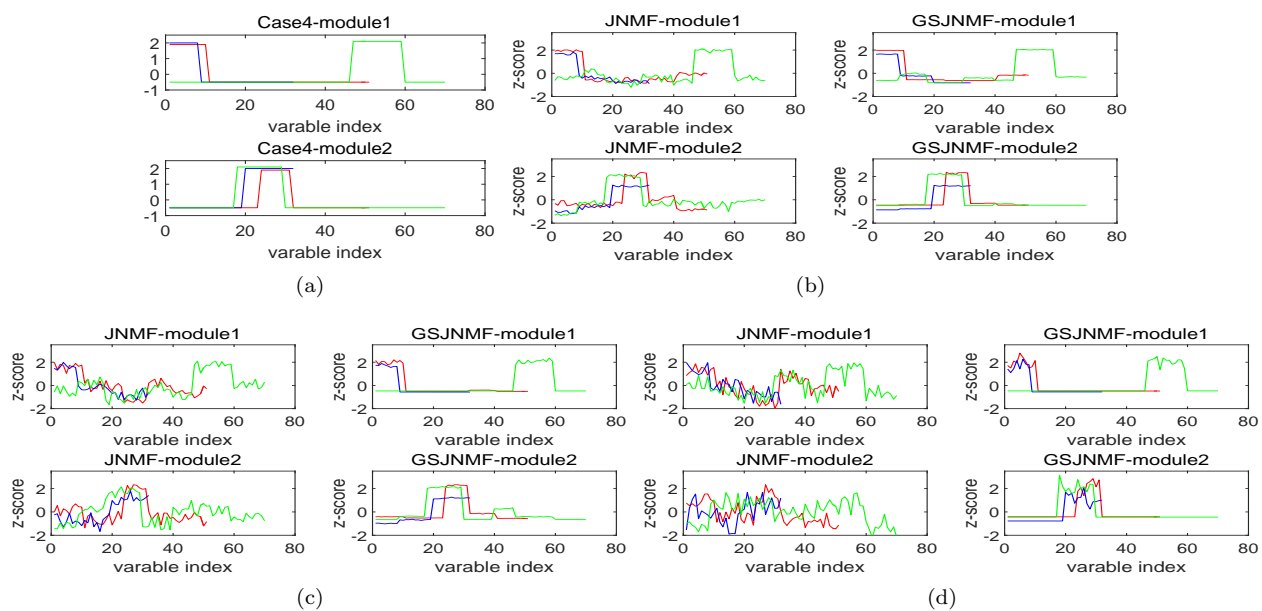

Figure A.4. The z-score of the variables from JNMF and GSJNMF model in Case 4. (a) The variable indices of the correlated module in Case 4. (b) The noise level  $\sigma = 0.5$ . (c) The noise level  $\sigma = 1$ . (d) The noise level  $\sigma = 1.5$ .
